# Supplementary material for: SARS-CoV-2 infection induces the dedifferentiation of multiciliated cells and impairs mucociliary clearance
Source: PubMed Central journal article supplement (PMC8285531; doi:10.1038/s41467-021-24521-x), 2021-07-16
Supplement: 41467_2021_24521_MOESM2_ESM.pdf [file 41467_2021_24521_MOESM2_ESM.pdf]

1 Robinot et al.

2

3 **LEGENDS TO THE SUPPLEMENTARY MOVIES**

4 **Supplementary Movie 1: Mucociliary clearance assay in a mock infected sample**

5 The movement of 30  $\mu\text{m}$  beads at the surface of an uninfected reconstructed bronchial epithelium is  
6 shown in the first half of the movie. The resulting tracks, color-coded for speed, are shown in the second  
7 half of the movie.

8 **Supplementary Movie 2: Mucociliary clearance assay in SARS-CoV-2 infected sample**

9 The movement of 30  $\mu\text{m}$  beads at the surface of a SARS-CoV-2 infected reconstructed bronchial epithelium  
10 at 7 dpi is shown in the first half of the movie. The resulting tracks, color-coded for speed, are shown in  
11 the second half of the movie.

12
